# Supplementary material
Source: HighWire-hosted journal article supplement (https://www.ijssurgery.com/content/17/4/547)
Supplement: inline-supplementary-material-1 [file inline-supplementary-material-1.docx]

| **Characteristic** | **Description** | **Score⁎** |
| --- | --- | --- |
|  |  |  |
| ***Primary tumour*** |  |  |
|  |  |  |
| Slow growth | Breast, thyroid, prostate, myeloma,  haemangioma, endothelioma, non Hodgkins lymphoma | 1 |
| Moderate growth | Kidney, uterus, tonsils, epipharynx,  synovial cell sarcoma, metastatic thymoma | 2 |
| Rapid growth | Stomach, colon, liver, melanoma, teratoma, sigmoid colon,pancreas,  rectum, unknown origin | 4 |
| Very rapid growth | Lung | 5 |
|  |  |  |
|  |  |  |
| ***General Condition (KPS†)*** |  |  |
|  |  |  |
| Good | KPS 80% to 100% | 0 |
| Moderate | KPS 50% to 70% | 1 |
| Poor | KPS 10% to 40% | 2 |
|  |  |  |
| **Risk Index of total score** | **Median Survival time (95% CI) months** |  |
| 1 | 23 (12 to 36) |  |
| 2 or 3 | 6 (4 to 9) |  |
| 4 or 5 | 4 (3 to 5) |  |
| 6 | 2 (1 to 3) |  |
| 7 | 1 (1 to 2) |  |
|  |  |  |

Supplementary Table 1: Oswestry Spinal Risk Index. ⁎ Total score is sum of the two subscores. †. Oswestry Spinal Risk Index total score and corresponding median survival time
