# Supplementary material
Source: HighWire-hosted journal article supplement (https://www.ijssurgery.com/content/17/4/547)
Supplement: inline-supplementary-material-2 [file inline-supplementary-material-2.docx]

| **Positive Prognostic Factors** | | **Score** |
| --- | --- | --- |
| No Visceral Metastases | | 1 |
| No Lung Cancer | | 1 |
| Solitary Skeletal Metastasis (Including Spine) | | 1 |
| Primary Tumor Breast, Kidney, Lymphoma, Multiple Myeloma | | 1 |
|  | **Total Points** | **Median Overall Survival** |
|  | 0 – 1 | 4.8 Months |
|  | 2 | 18.2 Months |
|  | 3 – 4 | 28.4 Months |

Supplementary Table 2: Modified Bauer Score
