# Supplementary material
Source: HighWire-hosted journal article supplement (https://www.ijssurgery.com/content/17/4/547)
Supplement: inline-supplementary-material-6 [file inline-supplementary-material-6.docx]

| **Variable** | **HR** | **95%CI** | **P-value** |
| --- | --- | --- | --- |
| *Univariable Analysis* |  |  |  |
| Age (≥ 64) | 1.284 | 0.860-1.918 | 0.221 |
| Female Gender | 0.863 | 0.578-1.289 | 0.472 |
| ASA (≥ 3 and 4) | 1.609 | 1.085-2.388 | **0.018** |
| Pre-operative Frankel classification |  |  | 0.0069 |
| *ABC* | **ref** |  |  |
| *D* | 0.721 | 0.458- 1.136 | 0.158 |
| *E* | 0.562 | 0.343- 0.926 | **0.024** |
| Pre-Operative Ambulatory Status (impaired) | 1.128 | 0.877- 1.923 | 0.193 |
| Spinal Metastasis (Multiple) | 1.905 | 1.270-2.858 | **0.002** |
| Extraspinal Bone Metastasis (yes) | 1.997 | 1.345-2.964 | **< 0.001** |
| Visceral Metastasis (yes) | 2.838 | 1.892-4.256 | **< 0.001** |
| Interval between indication and surgery (< 90 hours) | 0.880 | 0.594 – 1.305 | 0.526 |
| Complication General (yes) | 1.259 | 0.841 – 1.885 | 0.263 |
| Major Complication (yes) | 1.469 | 0.891 – 2.421 | 0.131 |
| Primary Tumor Growth (Tomita Scale) |  |  | **< 0.001** |
| *Slow* | **ref** |  |  |
| *Moderate* | 2.801 | 1.603– 4.891 | **< 0.001** |
| *Fast* | 4.790 | 3.000 – 7.648 | **< 0.001** |
| KPS |  |  | **0.003** |
| *10-40* | **ref** |  |  |
| *50-70* | 0.764 | 0.488 – 1.197 | 0.240 |
| *80-100* | 0.350 | 0.181 – 0.676 | **0.002** |
| Duration of surgery (< 250 min) | 1.219 | 0.745 – 1.992 | 0.430 |

*Supplementary Table 6: Univariable Cox Regression analysis on the association between predictor variables and decreased survival.*

*Abbreviations: HR, Hazard Ratio; 95%CI, 95% Confidence Interval; ASA, American society of anaesthesiologists; ref, reference variable;* *KPS, Karnofsky Performance Score*
